# Supplementary material for: Unveiling and overcoming the interfacial degradation between CuSCN and metal electrodes in perovskite solar cells
Source: Royal Society of Chemistry journal article supplement (doi:10.1039/d3ta02895j), 2023-01-01
Supplement: d3ta02895j1.pdf [file d3ta02895j1.pdf]

## Supporting Information

# Unveiling and overcoming the interfacial degradation between CuSCN and metal electrodes in perovskite solar cells

*Pengjie Hang<sup>a,1</sup>, Chenxia Kan<sup>a,1</sup>, Ge Li<sup>a</sup>, Jiangsheng Xie<sup>a,c,\*</sup>, Biao Li<sup>a</sup>, Yuxin Yao<sup>a</sup>,  
Degong Ding<sup>a</sup>, Zechen Hu<sup>a</sup>, Deren Yang<sup>a,b</sup>, Xuegong Yu<sup>a,b,\*</sup>*

<sup>a</sup> State Key Laboratory of Silicon and Advanced Semiconductor Materials, School of Materials Science & Engineering, Zhejiang University, Hangzhou, Zhejiang 310027, China.

<sup>b</sup> Zhejiang University-Hangzhou Global Scientific and Technological Innovation Center, Hangzhou 310014, P. R. China.

<sup>c</sup>School of Materials, Sun Yat-sen University, Guangzhou 510275, China.

### AUTHOR INFORMATION

<sup>1</sup>Pengjie Hang, Chenxia Kan contributed equally to this work.

### Corresponding Author

\*Corresponding author. E-mail addresses: [xiejsh8@mail.sysu.edu.cn](mailto:xiejsh8@mail.sysu.edu.cn) (J. Xie),

[yuxuegong@zju.edu.cn](mailto:yuxuegong@zju.edu.cn) (X. Yu).



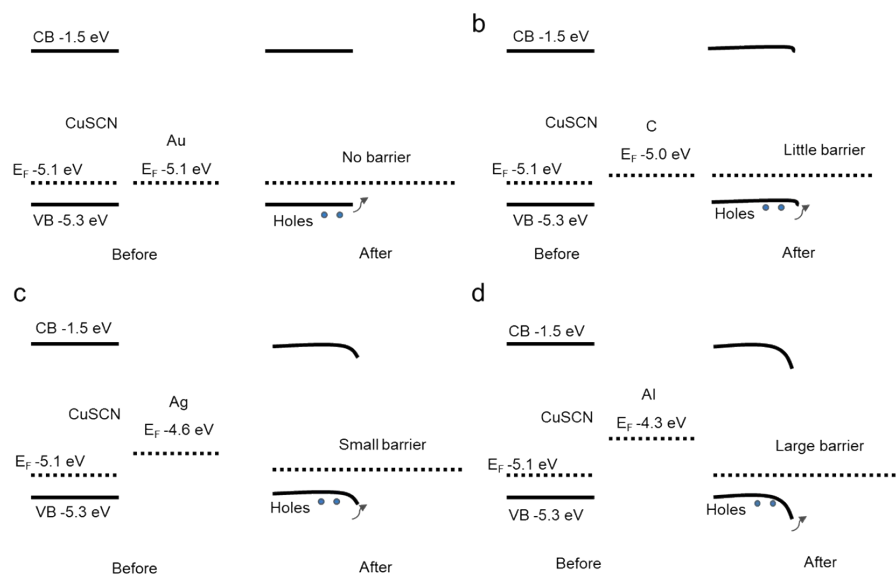

**Figure S1.** Energy band diagram of CuSCN with (a) Au, (b) C, (c) Ag and (d) Al electrodes before and after contact.

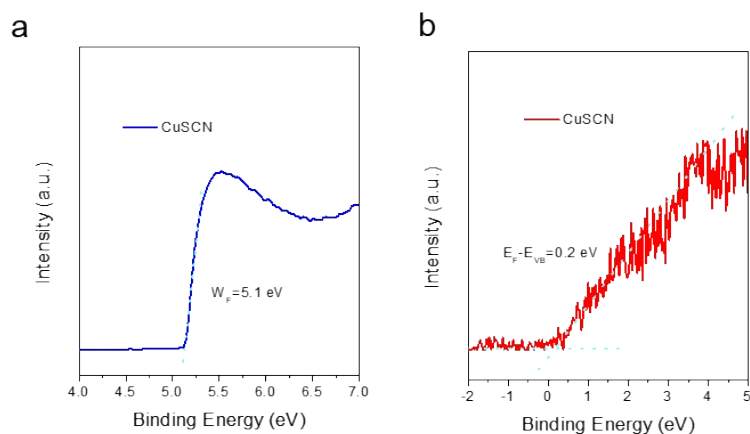

**Figure S2.** UPS measurement of CuSCN films.

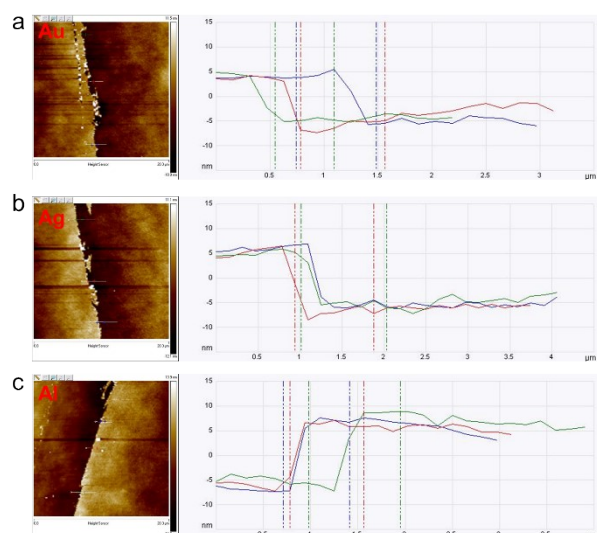

**Figure S3.** Atomic Force Microscope (AFM) images of metal stages with the thickness of around 10 nm.

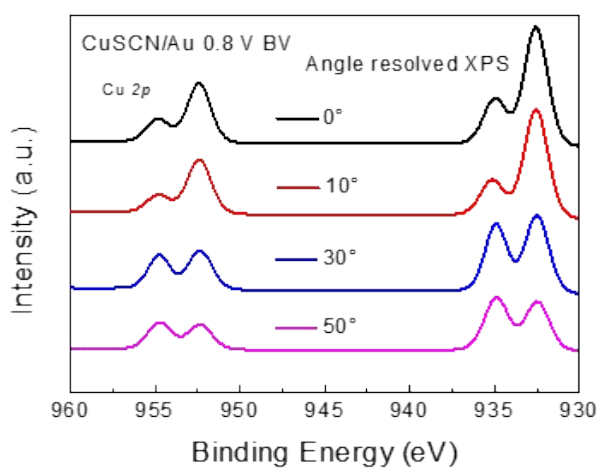

**Figure S4.** Angle resolved XPS test for CuSCN/Au sample under 0.8 V bias for one week.

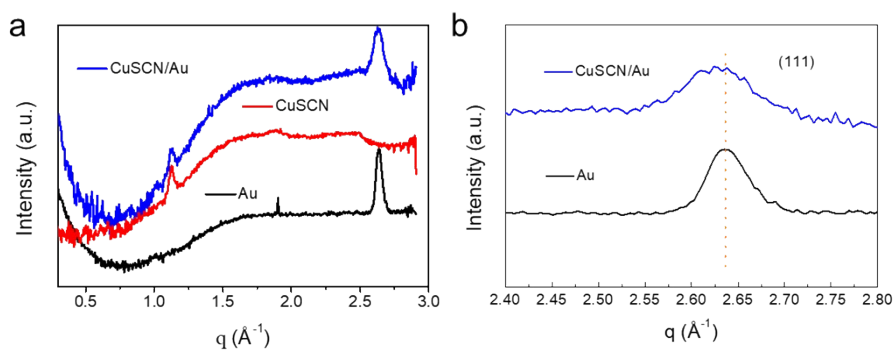

**Figure S5.** Polar intensity profiles along the  $q$  range of  $0.2\text{-}3.0 \text{ \AA}^{-1}$  for Au, CuSCN and CuSCN/Au thin films.

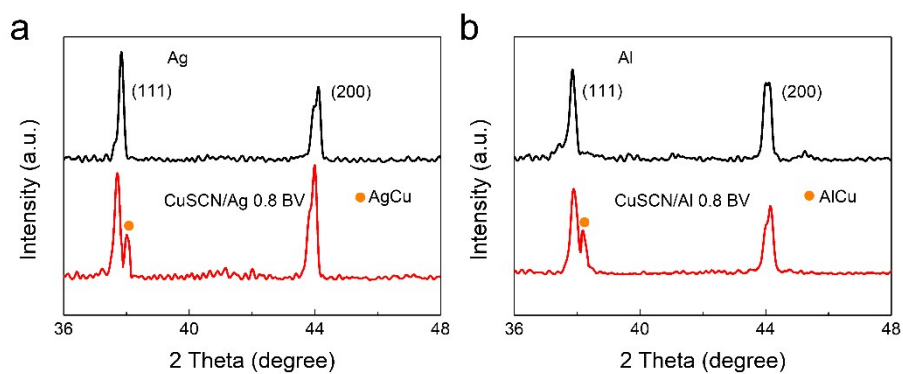

**Figure S6** XRD patterns of 10 nm Ag/Al and with CuSCN films with applied 0.8 V BV.

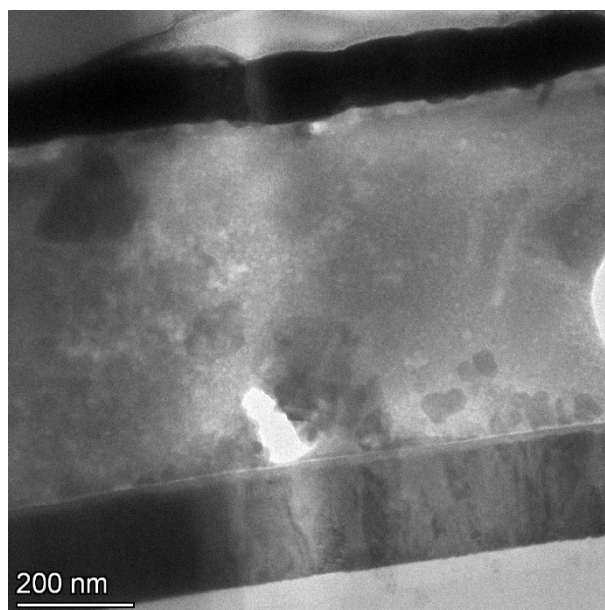

**Figure S7.** A cross-section TEM image of a whole perovskite solar cell.

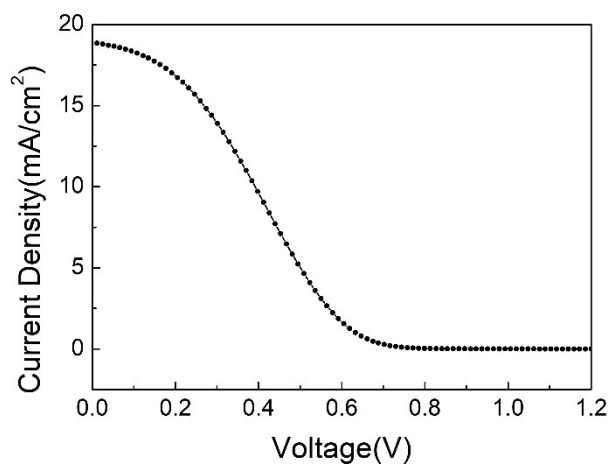

**Figure S8.** The  $J$ - $V$  curve of the device with Cu electrode.

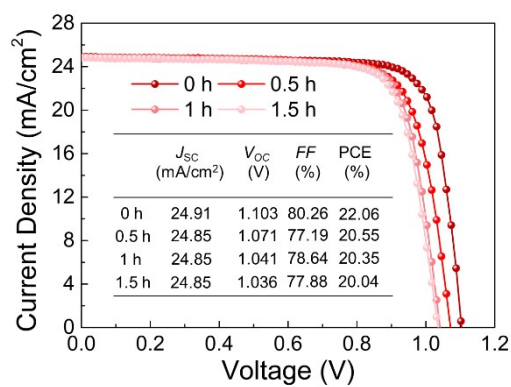

**Figure S9.** The  $J$ - $V$  curves of CuSCN-based devices with Au electrode under applied 0.8V BV.

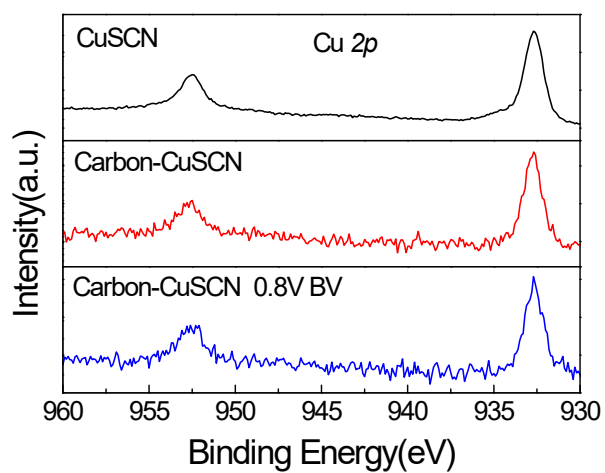

**Figure S10.** XPS spectra of Cu 2p for CuSCN, CuSCN in carbon with and without applied BV.

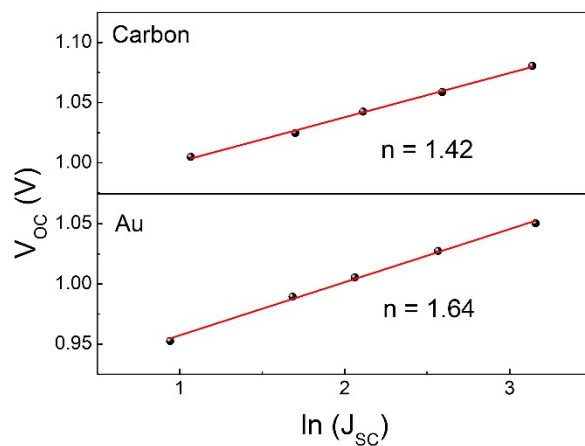

**Figure S11.**  $V_{OC}$  as a function of  $\ln(J_{SC})$  with ideality factors of 1.42 and 1.64 for devices with carbon and Au electrodes, respectively.

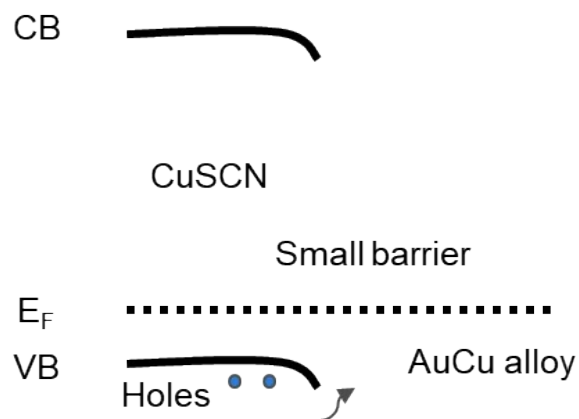

**Figure S12.** Energy band diagram of CuSCN/Au interface with AuCu alloy.

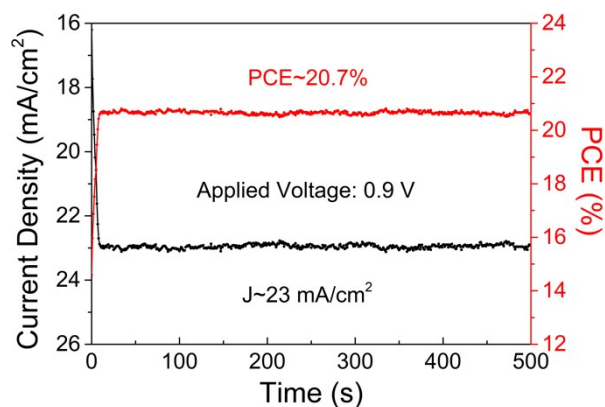

**Figure S13.** The stabilized state current density and efficiency for CuSCN-based device with carbon electrode.

**Table S1.** Photovoltaic parameters of devices in Figure 1a.

| Electrodes | $V_{OC}$ (V) | $J_{SC}$ (mA/cm <sup>2</sup> ) | $FF$ (%) | PCE (%) |
|------------|--------------|--------------------------------|----------|---------|
| Au         | 1.1036       | 24.909                         | 80.26    | 22.06   |
| Ag         | 0.9625       | 22.401                         | 51.80    | 11.17   |
| Al         | 0.9074       | 19.507                         | 32.92    | 5.83    |

**Table S2.** The summary of reported perovskite solar cells combining CuSCN with carbon electrodes.

| Configurations of perovskite solar cells                                                                      | PCE (%) | $V_{OC}$ (V) | $J_{SC}$ (mA cm <sup>-2</sup> ) | $FF$ (%) | Stability (conditions, lifetime)                                                          | Reference |
|---------------------------------------------------------------------------------------------------------------|---------|--------------|---------------------------------|----------|-------------------------------------------------------------------------------------------|-----------|
| FTO/TiO <sub>2</sub> /CsPbIBr <sub>2</sub> /CuSCN/C                                                           | 7.3     | 1.13         | 10.43                           | 62       | storage in ambient air, T <sub>94</sub> = 1100 h                                          | 1         |
| FTO/SnO <sub>2</sub> /CsFA <sub>0.83</sub> MA <sub>0.17</sub> PbI <sub>2.53</sub> Br <sub>0.47</sub> /CuSCN/C | 14.7    | 1.01         | 20.6                            | 70.1     | storage in ambient air, T <sub>93</sub> > 1920 h                                          | 2         |
| FTO/SnO <sub>2</sub> /CsFAMAPbIBr/CuSCN/C                                                                     | 15.81   | 1.08         | 22.09                           | 66.4     | storage in ambient air, T <sub>93</sub> = 2000 h; thermal stress, T <sub>83</sub> = 300 h | 3         |
| FTO/SnO <sub>2</sub> /CsFA <sub>0.83</sub> MA <sub>0.17</sub> PbI <sub>2.53</sub> Br <sub>0.47</sub> /CuSCN/C | 13.6    | 1.02         | 18.49                           | 72.1     | storage in dry air, T <sub>100</sub> = 2160 h; humidity stress, T <sub>98</sub> = 240 h   | 4         |
| FTO/c-TiO <sub>2</sub> /mp-TiO <sub>2</sub> /FAMACsPb(I,Br <sub>1-x</sub> ) <sub>3</sub> /CuSCN/C             | 15.5    | 1.02         | 22.0                            | 69.3     | humidity stress, T <sub>80</sub> = 1000 h                                                 | 5         |



|                                                                                                                                        |       |       |       |       |                                                                                                 |                  |
|----------------------------------------------------------------------------------------------------------------------------------------|-------|-------|-------|-------|-------------------------------------------------------------------------------------------------|------------------|
| FTO/c-TiO <sub>2</sub> /mp-TiO <sub>2</sub> /<br>(FAPbI <sub>3</sub> ) <sub>0.83</sub> (MAPbBr <sub>3</sub> ) <sub>0.17</sub> /CuSCN/C | 17.58 | 1.01  | 23.7  | 73.4  | humidity stress,<br>T <sub>95</sub> = 100 h;<br>irradiation stress,<br>T <sub>80</sub> = 1000 h | 6                |
| FTO/c-TiO <sub>2</sub> /mp-TiO <sub>2</sub> /<br>MAPbI <sub>3</sub> /CuSCN/C                                                           | 12.41 | 0.96  | 18.90 | 68    | humidity stress,<br>T <sub>68</sub> = 4800 h;<br>thermal stress,<br>T <sub>92</sub> = 175 h     | 7                |
| ITO/SnO <sub>2</sub> /FA <sub>0.95</sub> MA <sub>0.05</sub> Pb(I <sub>0.95</sub> Br <sub>0.05</sub> ) <sub>3</sub> /CuSCN/C            | 20.86 | 1.142 | 24.5  | 74.58 | thermal stress,<br>T <sub>80</sub> = 300 h;<br>MPP tracking,<br>T <sub>80</sub> = 1000 h        | <b>This work</b> |

---

## References:

1. J. Liu, M. Lei, W. Zhang and G. Wang, *Sustain. Energy Fuels*, 2020, **4**, 4249-4256.
2. Y. Yang, M. T. Hoang, D. Yao, N. D. Pham, V. T. Tiong, X. Wang and H. Wang, *J. Mater. Chem. A*, 2020, **8**, 12723-12734.
3. F. Meng, L. Gao, A. Liu, Y. Li and T. Ma, *Mater. Today Energy*, 2021, **21**, 100801.
4. Y. Yang, N. D. Pham, D. Yao, L. Fan, M. T. Hoang, V. T. Tiong, Z. Wang, H. Zhu and H. Wang, *ACS Appl. Mater. Interfaces*, 2019, **11**, 28431-28441.
5. S. Zhu, J. Tian, J. Zhang, C. Gao and X. Liu, *ACS Appl. Energy Mater.*, 2021, **4**, 5554-5559.
6. X. Wu, L. Xie, K. Lin, J. Lu, K. Wang, W. Feng, B. Fan, P. Yin and Z. Wei, *J. Mater. Chem. A*, 2019, **7**, 12236-12243.
7. A. K. Baranwal, H. Kanda, N. Shibayama and S. Ito, *Sustain. Energy Fuels*, 2018, **2**, 2778-2787.
